# Supplementary material for: Synthesis, characterization and catalytic activity of copper(ii) complexes containing a redox-active benzoxazole iminosemiquinone ligand
Source: Royal Society of Chemistry journal article supplement (doi:10.1039/c3dt00004d), 2013-01-01
Supplement: c3dt00004d.pdf [file c3dt00004d.pdf]

## SUPPORTING INFORMATION

### **Synthesis, Characterization and Catalytic Activity of Copper(II) Complexes containing a Redox-Active Benzoxazole Iminosemiquinone Ligand**

**S. Esmael Balaghi<sup>a</sup>, Elham Safaei<sup>\*a</sup>, Linus Chiang<sup>b</sup>, Edwin W. Y. Wong<sup>b</sup>, Didier Savard<sup>b</sup>, Ryan  
Clarke, and Tim Storr<sup>\*b</sup>**

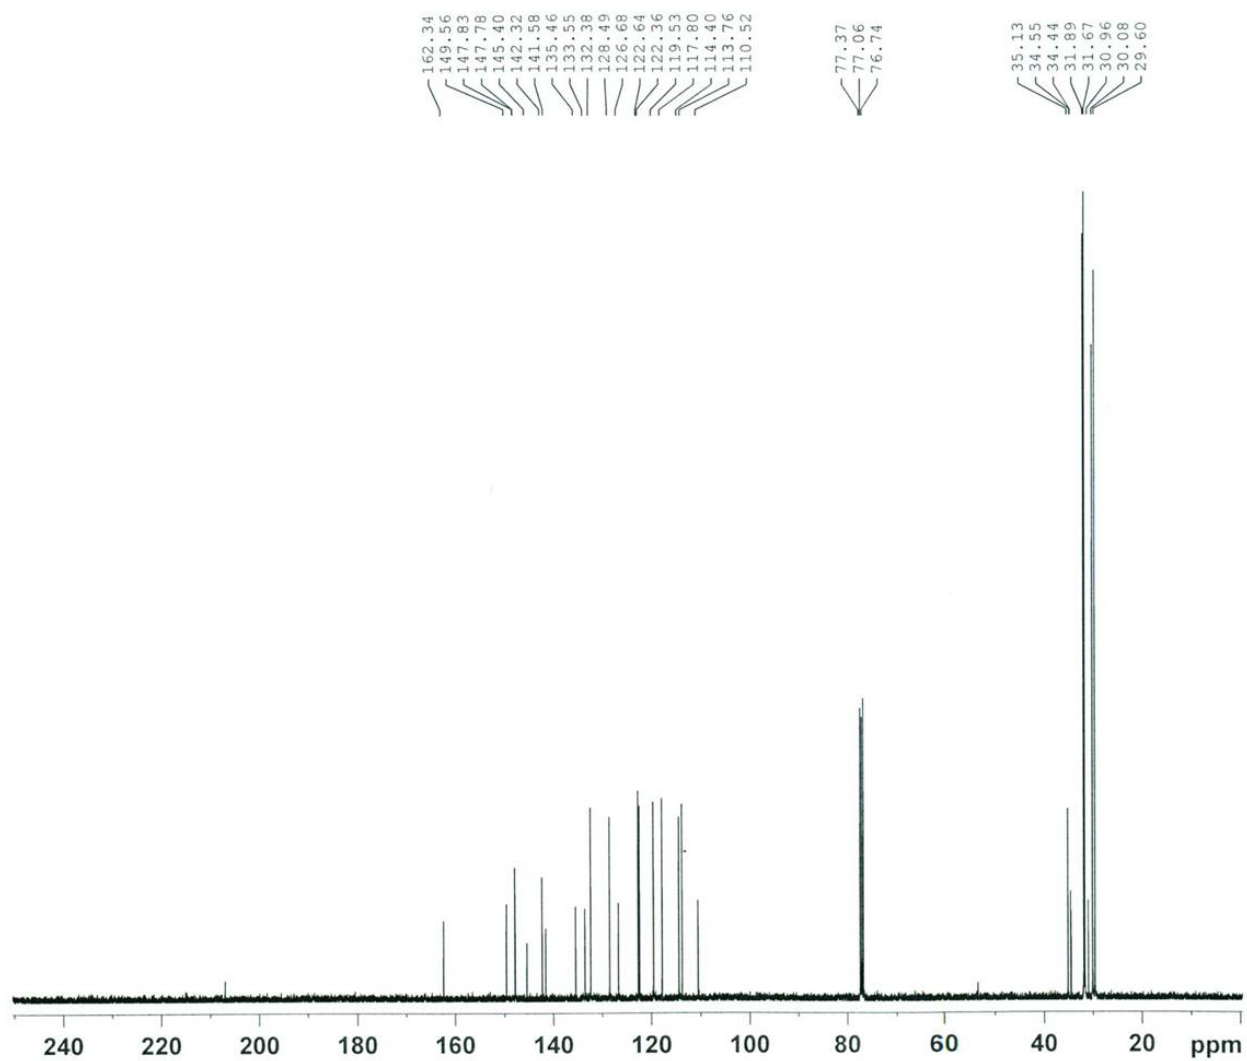

Figure S1.  $^{13}\text{C}$  NMR titration of  $\text{HL}^{\text{BAP}}$ .

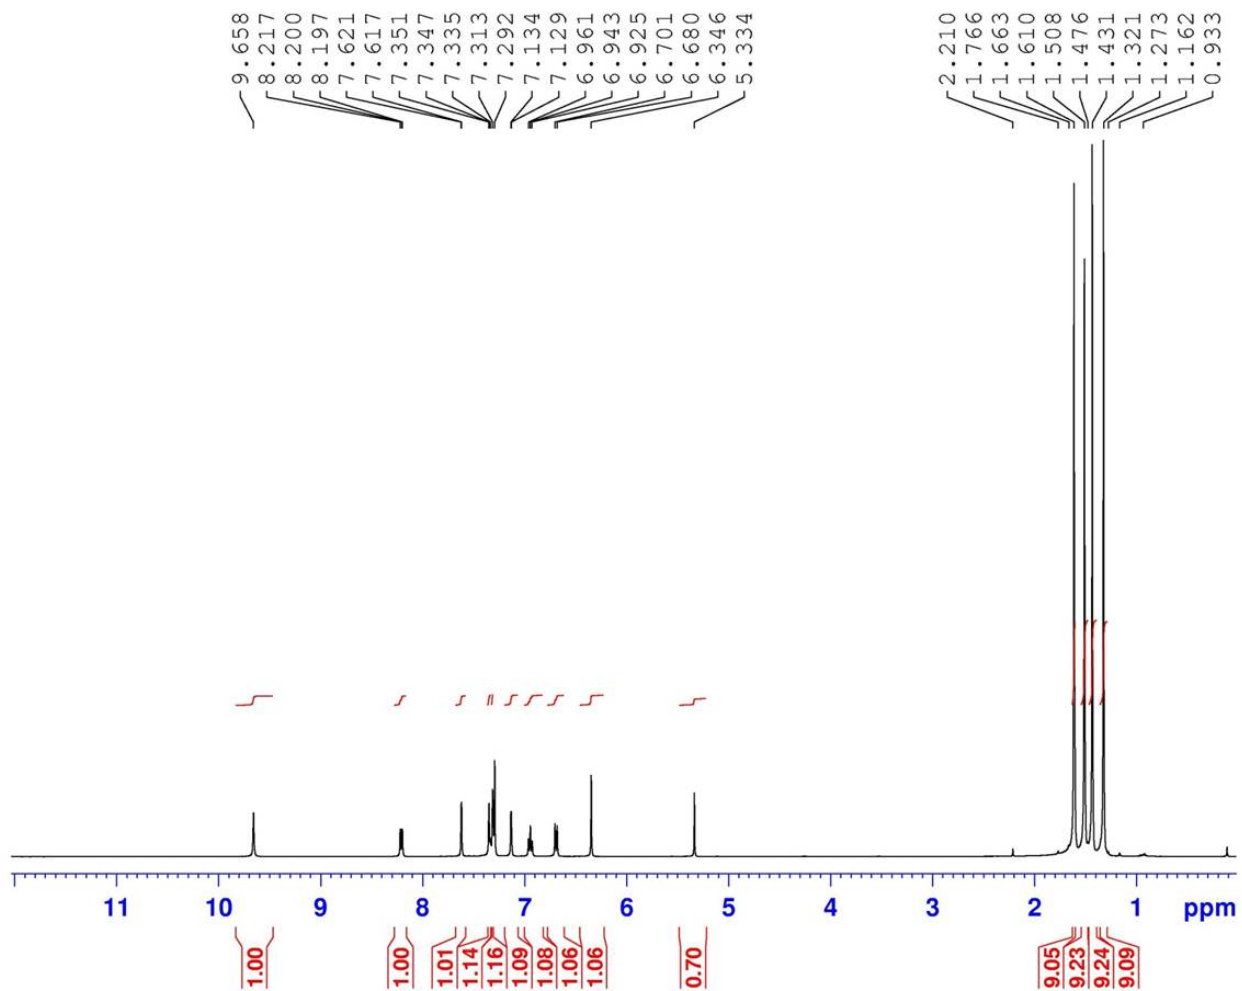

Figure S2. <sup>1</sup>H NMR titration of HL<sup>BAP</sup>.

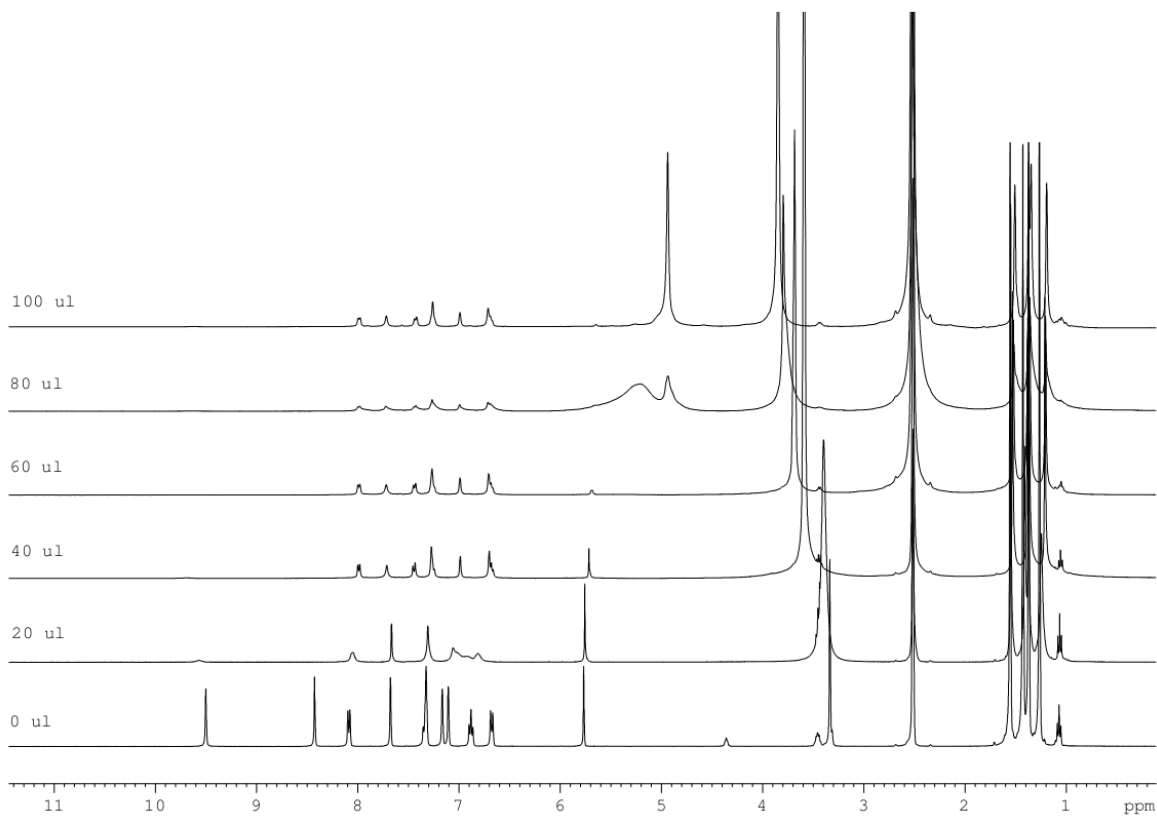

**Figure S3.** <sup>1</sup>H NMR titration of HL<sup>BAP</sup> using NaOD.

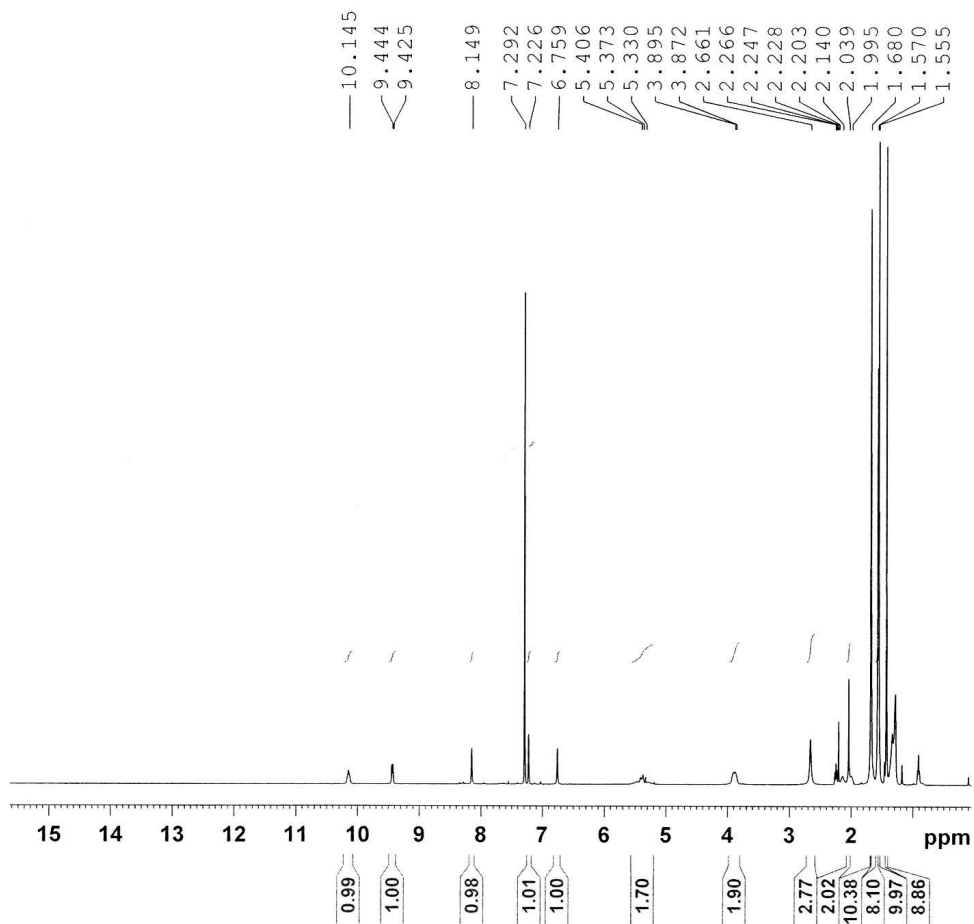

Figure S4.  $^1\text{H}$  NMR spectrum of  $\text{L}^{\text{BIS}}\text{Cu}^{\text{II}}\text{OAc}$ .

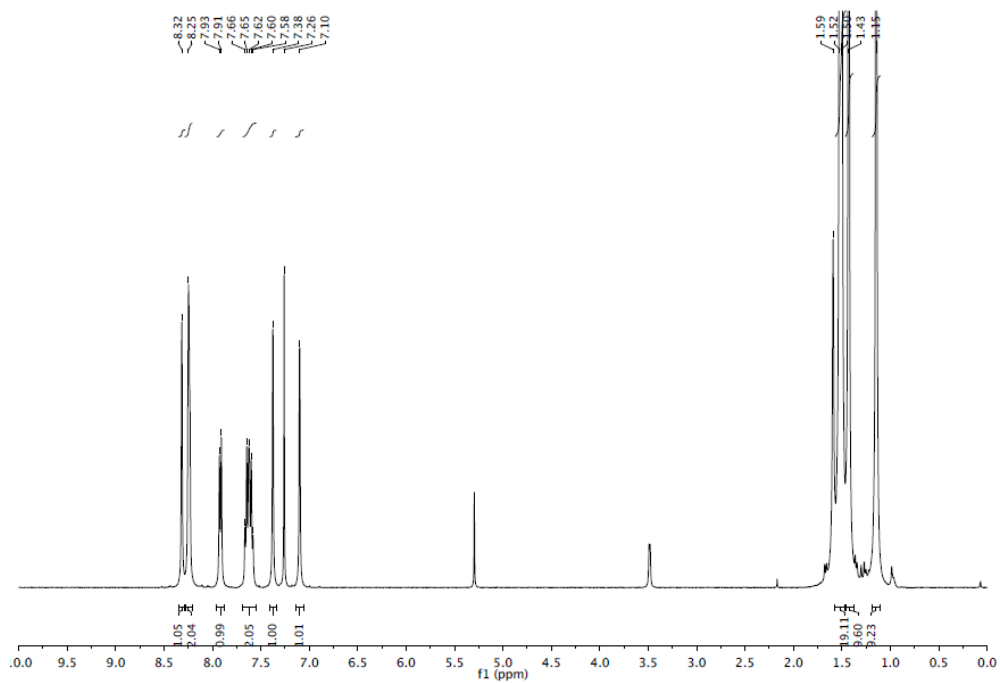

Figure S5.  $^1\text{H}$  NMR spectrum of  $\text{L}^{\text{BIS}}\text{Cu}^{\text{II}}\text{Cl}$ .

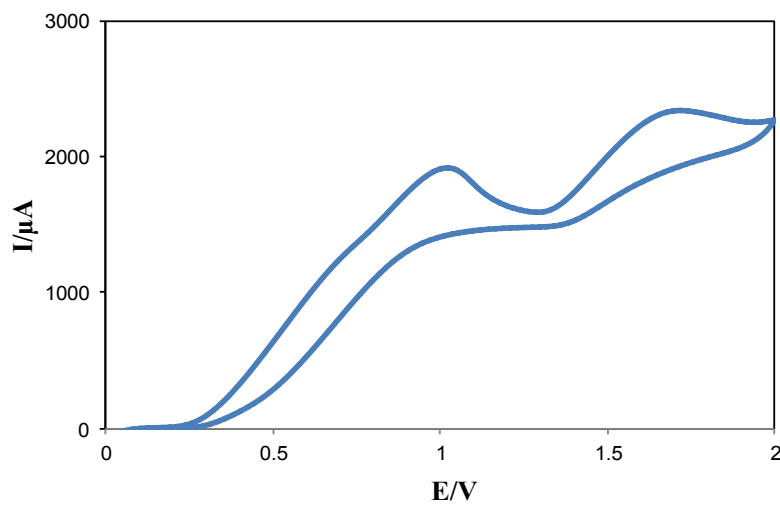

Figure S6. Cyclic voltammograms of  $\text{HL}^{\text{BAP}}$ . Conditions: 2mM, 0.1 M  $\text{NBu}_4\text{ClO}_4$ , scan rate 50 mV/s,  $\text{CH}_2\text{Cl}_2$ , 203 K.

Broken symmetry optimized coordinates for L<sup>BIS</sup>Cu<sup>II</sup>Cl (B3LYP, 6-31g\*)

|    |             |             |             |
|----|-------------|-------------|-------------|
| Cu | -0.27151100 | -0.75578900 | -1.03978600 |
| Cl | 0.68553800  | -2.20058000 | -2.41715500 |
| O  | -1.81244500 | -1.78110300 | -0.49378000 |
| O  | 2.53426600  | 2.06284200  | -0.07204400 |
| N  | 1.27783900  | 0.25445100  | -0.41814700 |
| N  | -1.44961800 | 0.77535600  | -0.74257500 |
| C  | 2.55388400  | -0.17505500 | -0.04066900 |
| C  | 3.33130000  | 0.95766200  | 0.18321100  |
| C  | -2.82275300 | -1.04661500 | -0.19163700 |
| C  | 1.31828500  | 1.56839700  | -0.43092700 |
| C  | 5.15420600  | -0.37919100 | 0.75485800  |
| C  | 0.64048400  | 3.84149900  | -1.06262200 |
| C  | 4.40435400  | -1.56287000 | 0.53084100  |
| C  | -1.61395500 | 4.36292000  | -1.70823900 |
| C  | -2.62671100 | 0.40375100  | -0.18282500 |
| C  | -4.10732800 | -1.59167400 | 0.17085300  |
| C  | -5.03361800 | -0.70455200 | 0.67565700  |
| C  | 3.07369900  | -1.45871500 | 0.12689700  |
| C  | -1.99875200 | 3.05523400  | -1.45108600 |
| C  | 0.27941100  | 2.50250200  | -0.81516200 |
| C  | -5.90530300 | 1.55196900  | 1.50346500  |
| C  | -3.44393100 | -3.88631000 | 0.99413100  |
| C  | -4.37610000 | -3.10009400 | 0.03865200  |
| C  | -3.60864600 | 1.23554800  | 0.41720300  |
| C  | -0.29166100 | 4.77137700  | -1.49471700 |
| C  | -1.08034300 | 2.09372300  | -0.97232900 |
| C  | 4.66737400  | 0.92327700  | 0.59353200  |
| C  | -4.80460300 | 0.70202400  | 0.84877700  |
| C  | -5.50351200 | 3.03289300  | 1.63433500  |
| C  | -4.12107200 | -3.54778200 | -1.42209800 |
| C  | 5.09005500  | -2.92884200 | 0.72839300  |
| C  | -7.19338200 | 1.47660000  | 0.64747900  |
| C  | -5.83207800 | -3.45598800 | 0.39605300  |
| C  | -6.20035000 | 1.00768600  | 2.92296500  |
| C  | 4.82518800  | 3.05429000  | 1.92522100  |
| C  | 5.49839300  | 2.19255600  | 0.82959800  |
| C  | 5.58385300  | 3.00188900  | -0.48720800 |
| C  | 6.93129000  | 1.86410400  | 1.28750100  |
| C  | 4.13166400  | -4.10306100 | 0.45230200  |
| C  | 6.28793500  | -3.04774800 | -0.24418100 |
| C  | 5.59574700  | -3.05129900 | 2.18549400  |
| H  | 6.18417600  | -0.49291000 | 1.06922200  |
| H  | 1.67554900  | 4.13416200  | -0.92544300 |
| H  | -2.34758100 | 5.06776300  | -2.08994500 |
| H  | -5.99508500 | -1.09082500 | 0.99002800  |
| H  | 2.45569900  | -2.31852400 | -0.09296000 |
| H  | -3.01625800 | 2.74204500  | -1.65330500 |
| H  | -3.64286900 | -4.96147600 | 0.90522400  |
| H  | -2.39330400 | -3.71006400 | 0.75662200  |
| H  | -3.62067800 | -3.59642600 | 2.03717900  |
| H  | -3.39831000 | 2.28991900  | 0.53133600  |

|   |             |             |             |
|---|-------------|-------------|-------------|
| H | 0.00932000  | 5.79599900  | -1.68876000 |
| H | -6.31636200 | 3.59490000  | 2.10742900  |
| H | -4.60948600 | 3.15935000  | 2.25531700  |
| H | -5.31125000 | 3.49187300  | 0.65790800  |
| H | -4.31738800 | -4.62241100 | -1.52043200 |
| H | -4.78994700 | -3.02033700 | -2.11305400 |
| H | -3.08931400 | -3.35996200 | -1.72519600 |
| H | -7.99102500 | 2.06826700  | 1.11273700  |
| H | -7.56018600 | 0.45047100  | 0.54277500  |
| H | -7.01858700 | 1.87388400  | -0.35891700 |
| H | -5.98470200 | -4.53102000 | 0.25197900  |
| H | -6.55271600 | -2.93180300 | -0.24299100 |
| H | -6.06979100 | -3.23053200 | 1.44250000  |
| H | -6.98720800 | 1.60434600  | 3.40010700  |
| H | -6.53984900 | -0.03289600 | 2.90281800  |
| H | -5.30630900 | 1.05632100  | 3.55477500  |
| H | 5.40749300  | 3.96786400  | 2.09522300  |
| H | 4.76917500  | 2.50741700  | 2.87333500  |
| H | 3.81063800  | 3.35021400  | 1.64347700  |
| H | 6.17438900  | 3.91260900  | -0.33107800 |
| H | 6.06722800  | 2.41519900  | -1.27637800 |
| H | 4.59419600  | 3.29991200  | -0.84560200 |
| H | 7.48502500  | 2.79596700  | 1.44641900  |
| H | 7.47696000  | 1.27988600  | 0.53809000  |
| H | 6.94153300  | 1.30862600  | 2.23211300  |
| H | 4.66136400  | -5.05060800 | 0.60124500  |
| H | 3.27150000  | -4.09595100 | 1.13135600  |
| H | 3.75414800  | -4.09187200 | -0.57572300 |
| H | 6.78502500  | -4.01688800 | -0.11577700 |
| H | 5.95451000  | -2.97192000 | -1.28504800 |
| H | 7.03637200  | -2.26624900 | -0.07318200 |
| H | 6.08642700  | -4.02055100 | 2.33527900  |
| H | 4.76505800  | -2.97839400 | 2.89675900  |
| H | 6.32184700  | -2.27084000 | 2.43732700  |
